# Supplementary material for: Phylodynamic and Genetic Diversity of Canine Parvovirus Type 2c in Taiwan
Source: PubMed Central journal article supplement (PMC5751304; doi:10.3390/ijms18122703), 2017-12-13
Supplement: ijms-18-02703-s001.pdf [file ijms-18-02703-s001.pdf]

Supplementary Table 1 Details of 163 complete VP2 genes of CPV-2 from GenBank.

| Isolate           | Year | Origin         | Genotype | Accession No. |
|-------------------|------|----------------|----------|---------------|
| <i>This study</i> |      |                |          |               |
| C104-014          | 2015 | Taiwan (TW)    | 2c       | KU244254      |
| C104-166          | 2015 | Taiwan (TW)    | 2c       | KX421786      |
| C104-216          | 2015 | Taiwan (TW)    | 2c       | KX421787      |
| C105-013          | 2016 | Taiwan (TW)    | 2c       | KX421788      |
| C105-030          | 2016 | Taiwan (TW)    | 2c       | KX421789      |
| <i>Reference</i>  |      |                |          |               |
| CPV-42            | 2011 | Taiwan (TW)    | 2a       | JX048605      |
| CPV-88            | 2011 | Taiwan (TW)    | 2b       | JX048607      |
| Arg32             | 2008 | Argentina (AR) | 2c       | JF414818      |
| Arg35             | 2008 | Argentina (AR) | 2c       | JF414819      |
| Arg44             | 2009 | Argentina (AR) | 2c       | JF414820      |
| Arg48             | 2009 | Argentina (AR) | 2c       | JF414821      |
| Arg60             | 2009 | Argentina (AR) | 2c       | JF414823      |
| Arg64             | 2010 | Argentina (AR) | 2c       | JF414822      |
| Arg66             | 2010 | Argentina (AR) | 2c       | JF414824      |
| Arg67             | 2010 | Argentina (AR) | 2c       | JF414825      |
| Arg68             | 2010 | Argentina (AR) | 2c       | JF414826      |
| 195/08            | 2008 | Belgium (BE)   | 2c       | FJ005247      |
| 06/09             | 2009 | China (CN)     | 2c       | GU380303      |
| 08/09             | 2009 | China (CN)     | 2c       | GU380305      |
| CPV-SD-14-12      | 2014 | China (CN)     | 2c       | KR611522      |
| HRB-A6            | 2014 | China (CN)     | 2c       | KT074339      |
| G1                | 2009 | China (CN)     | 2c       | KF482468      |
| G15               | 2009 | China (CN)     | 2c       | KF482471      |
| BJ14-8            | 2014 | China (CN)     | 2c       | KT162005      |
| 2c_ME1_ECU2012    | 2012 | Ecuador (EC)   | 2c       | KF149962      |
| 2c_ME10_ECU2012   | 2012 | Ecuador (EC)   | 2c       | KF149963      |
| 2c_ME23_ECU2012   | 2012 | Ecuador (EC)   | 2c       | KF149964      |
| 2c_ME25_ECU2012   | 2012 | Ecuador (EC)   | 2c       | KF149965      |
| 2c_ME27_ECU2012   | 2012 | Ecuador (EC)   | 2c       | KF149967      |
| 2c_ME28_ECU2012   | 2012 | Ecuador (EC)   | 2c       | KF149984      |
| 2c_ME29_ECU2012   | 2012 | Ecuador (EC)   | 2c       | KF149968      |
| 2c_ME31_ECU2012   | 2012 | Ecuador (EC)   | 2c       | KF149969      |
| 2c_ME32_ECU2012   | 2012 | Ecuador (EC)   | 2c       | KF149971      |
| 2c_ME34_ECU2012   | 2012 | Ecuador (EC)   | 2c       | KF149970      |

|                 |      |              |    |          |
|-----------------|------|--------------|----|----------|
| 2c_ME26_ECU2012 | 2012 | Ecuador (EC) | 2c | KF149966 |
| G7/97           | 1997 | Germany (DE) | 2c | FJ005196 |
| G51/97          | 1997 | Germany (DE) | 2c | FJ005197 |
| G133/97         | 1997 | Germany (DE) | 2c | FJ005198 |
| G172/97         | 1997 | Germany (DE) | 2c | FJ005199 |
| G359/97         | 1997 | Germany (DE) | 2c | FJ005200 |
| G362/97         | 1997 | Germany (DE) | 2c | FJ005201 |
| G367/97         | 1997 | Germany (DE) | 2c | FJ005202 |
| G52-9/2-98      | 1998 | Germany (DE) | 2c | FJ005203 |
| G333/99         | 1999 | Germany (DE) | 2c | FJ005204 |
| GR51/08         | 2008 | Greece (GR)  | 2c | GQ865518 |
| GR09/09         | 2009 | Greece (GR)  | 2c | GQ865519 |
| 56/00           | 2000 | Italy (IT)   | 2c | FJ222821 |
| 136/00          | 2000 | Italy (IT)   | 2c | FJ005195 |
| 279/04          | 2004 | Italy (IT)   | 2c | FJ005205 |
| 287/04          | 2004 | Italy (IT)   | 2c | FJ005206 |
| 290/04          | 2004 | Italy (IT)   | 2c | FJ005207 |
| 291/04          | 2004 | Italy (IT)   | 2c | FJ005208 |
| 303/04          | 2004 | Italy (IT)   | 2c | FJ005209 |
| 307/04          | 2004 | Italy (IT)   | 2c | FJ005210 |
| 342/04          | 2004 | Italy (IT)   | 2c | FJ005211 |
| 349/04          | 2004 | Italy (IT)   | 2c | FJ005212 |
| 9/05            | 2005 | Italy (IT)   | 2c | FJ005213 |
| 252/06          | 2006 | Italy (IT)   | 2c | FJ005215 |
| 284/06          | 2006 | Italy (IT)   | 2c | FJ005216 |
| 327/06          | 2006 | Italy (IT)   | 2c | FJ005217 |
| 330/06          | 2006 | Italy (IT)   | 2c | FJ005218 |
| 336/06          | 2006 | Italy (IT)   | 2c | FJ005219 |
| 337/06          | 2006 | Italy (IT)   | 2c | FJ005220 |
| 340/06          | 2006 | Italy (IT)   | 2c | FJ005221 |
| 359/06          | 2006 | Italy (IT)   | 2c | FJ005222 |
| 365/06          | 2006 | Italy (IT)   | 2c | FJ005223 |
| 367/06          | 2006 | Italy (IT)   | 2c | FJ005224 |
| 382/06          | 2006 | Italy (IT)   | 2c | FJ005225 |
| 383/06          | 2006 | Italy (IT)   | 2c | FJ005226 |
| 389/06          | 2006 | Italy (IT)   | 2c | FJ005227 |
| 393/06          | 2006 | Italy (IT)   | 2c | FJ005228 |
| 397/06          | 2006 | Italy (IT)   | 2c | FJ005229 |

|           |      |              |    |          |
|-----------|------|--------------|----|----------|
| 398/06    | 2006 | Italy (IT)   | 2c | FJ005230 |
| 406/06    | 2006 | Italy (IT)   | 2c | FJ005231 |
| 411/06    | 2006 | Italy (IT)   | 2c | FJ005232 |
| 40/07     | 2007 | Italy (IT)   | 2c | FJ005233 |
| 43/03     | 2007 | Italy (IT)   | 2c | FJ005234 |
| 159/07    | 2007 | Italy (IT)   | 2c | FJ005237 |
| 158/07    | 2007 | Italy (IT)   | 2c | FJ005238 |
| 165/07-A  | 2007 | Italy (IT)   | 2c | FJ005239 |
| 208/07    | 2007 | Italy (IT)   | 2c | FJ005240 |
| 215/07-2  | 2007 | Italy (IT)   | 2c | FJ005241 |
| 217/07    | 2007 | Italy (IT)   | 2c | FJ005242 |
| 243/07    | 2007 | Italy (IT)   | 2c | FJ005243 |
| 127/08-A  | 2008 | Italy (IT)   | 2c | FJ005244 |
| 127/08-B  | 2008 | Italy (IT)   | 2c | FJ005245 |
| 219/08-2  | 2008 | Italy (IT)   | 2c | FJ005248 |
| 219/08-5  | 2008 | Italy (IT)   | 2c | FJ005249 |
| 219/08-13 | 2008 | Italy (IT)   | 2c | FJ005250 |
| 239/08    | 2008 | Italy (IT)   | 2c | FJ005251 |
| cat300/10 | 2010 | Italy (IT)   | 2c | HQ025913 |
| 67/06     | 2006 | Spain (ES)   | 2c | FJ005214 |
| 128/08    | 2008 | Spain (ES)   | 2c | FJ005246 |
| M181      | 2009 | Uruguay (UY) | 2c | KC196079 |
| M101      | 2007 | Uruguay (UY) | 2c | KC196080 |
| M95       | 2007 | Uruguay (UY) | 2c | KC196081 |
| M86       | 2007 | Uruguay (UY) | 2c | KC196082 |
| M82       | 2007 | Uruguay (UY) | 2c | KC196083 |
| M72       | 2007 | Uruguay (UY) | 2c | KC196084 |
| M57       | 2007 | Uruguay (UY) | 2c | KC196085 |
| M55       | 2006 | Uruguay (UY) | 2c | KC196086 |
| M52       | 2006 | Uruguay (UY) | 2c | KC196087 |
| M354      | 2011 | Uruguay (UY) | 2c | KC196088 |
| M349      | 2011 | Uruguay (UY) | 2c | KC196089 |
| M346      | 2011 | Uruguay (UY) | 2c | KC196090 |
| M326      | 2011 | Uruguay (UY) | 2c | KC196091 |
| M317      | 2011 | Uruguay (UY) | 2c | KC196092 |
| M307      | 2011 | Uruguay (UY) | 2c | KC196093 |
| M269      | 2010 | Uruguay (UY) | 2c | KC196094 |
| M258      | 2010 | Uruguay (UY) | 2c | KC196095 |

|       |      |              |    |          |
|-------|------|--------------|----|----------|
| M247  | 2010 | Uruguay (UY) | 2c | KC196096 |
| M242  | 2010 | Uruguay (UY) | 2c | KC196097 |
| M235  | 2010 | Uruguay (UY) | 2c | KC196098 |
| M21   | 2006 | Uruguay (UY) | 2c | KC196099 |
| M196  | 2009 | Uruguay (UY) | 2c | KC196100 |
| M187  | 2009 | Uruguay (UY) | 2c | KC196101 |
| M185  | 2009 | Uruguay (UY) | 2c | KC196102 |
| M173  | 2009 | Uruguay (UY) | 2c | KC196103 |
| M169  | 2008 | Uruguay (UY) | 2c | KC196104 |
| M152  | 2008 | Uruguay (UY) | 2c | KC196105 |
| M135  | 2008 | Uruguay (UY) | 2c | KC196106 |
| M129  | 2008 | Uruguay (UY) | 2c | KC196107 |
| M104  | 2008 | Uruguay (UY) | 2c | KC196108 |
| M120  | 2008 | Uruguay (UY) | 2c | KC196109 |
| UY12  | 2006 | Uruguay (UY) | 2c | KM457103 |
| UY47  | 2006 | Uruguay (UY) | 2c | KM457104 |
| UY52  | 2006 | Uruguay (UY) | 2c | KM457105 |
| UY55  | 2006 | Uruguay (UY) | 2c | KM457106 |
| UY72  | 2007 | Uruguay (UY) | 2c | KM457107 |
| UY82  | 2007 | Uruguay (UY) | 2c | KM457108 |
| UY95  | 2007 | Uruguay (UY) | 2c | KM457109 |
| UY101 | 2007 | Uruguay (UY) | 2c | KM457110 |
| UY120 | 2008 | Uruguay (UY) | 2c | KM457111 |
| UY135 | 2008 | Uruguay (UY) | 2c | KM457112 |
| UY152 | 2008 | Uruguay (UY) | 2c | KM457113 |
| UY169 | 2008 | Uruguay (UY) | 2c | KM457114 |
| UY173 | 2009 | Uruguay (UY) | 2c | KM457115 |
| UY185 | 2009 | Uruguay (UY) | 2c | KM457116 |
| UY187 | 2009 | Uruguay (UY) | 2c | KM457117 |
| UY190 | 2009 | Uruguay (UY) | 2c | KM457118 |
| UY235 | 2010 | Uruguay (UY) | 2c | KM457119 |
| UY242 | 2010 | Uruguay (UY) | 2c | KM457120 |
| UY247 | 2010 | Uruguay (UY) | 2c | KM457121 |
| UY258 | 2010 | Uruguay (UY) | 2c | KM457122 |
| UY261 | 2010 | Uruguay (UY) | 2c | KM457123 |
| UY307 | 2011 | Uruguay (UY) | 2c | KM457124 |
| UY317 | 2011 | Uruguay (UY) | 2c | KM457125 |
| UY318 | 2010 | Uruguay (UY) | 2c | KM457126 |

|            |      |               |    |          |
|------------|------|---------------|----|----------|
| UY326      | 2011 | Uruguay (UY)  | 2c | KM457127 |
| UY346      | 2011 | Uruguay (UY)  | 2c | KM457128 |
| UY349      | 2011 | Uruguay (UY)  | 2c | KM457129 |
| UY354      | 2011 | Uruguay (UY)  | 2c | KM457130 |
| UY368      | 2011 | Uruguay (UY)  | 2c | KM457131 |
| UY370c     | 2011 | Uruguay (UY)  | 2c | KM457142 |
| HNI-4-1    | 2004 | Vietnam (VN)  | 2c | AB120727 |
| 67/07-11   | 2007 | USA (US)      | 2c | FJ005235 |
| 110/07-27  | 2007 | USA (US)      | 2c | FJ005236 |
| isolate 39 | 1984 | USA (US)      | 2b | M74849   |
| CPV-b      | 1978 | USA (US)      | 2  | M38245   |
| CPV-15     | 1984 | USA (US)      | 2  | M24003   |
| CPV-435    | 2003 | USA (US)      | 2a | AY742953 |
| CPV-436    | 2003 | USA (US)      | 2b | AY742955 |
| PT178/12   | 2012 | Portugal (PT) | 2c | KR559893 |

---
